# Supplementary material for: Muscle contraction type-specific association of acceleration and deceleration performance with rates of force development
Source: PeerJ. 2025 Aug 12;13:e19862. doi: 10.7717/peerj.19862 (PMC12356181; doi:10.7717/peerj.19862)
Supplement: Supplemental Information 2 — Abbreviation: RFD, rate of force development; 10-yard sprint, 10-yard sprint time; CODdeficit, change of direction deficit; Pro-agility test, total time of pro-agility test. [file peerj-13-19862-s002.xlsx]

## Sheet: data
					Squat jump						Countermovement jump					Isometric squat
no.	age (year)	height (cm)	bodyweight (kg)		Concentric peak force (N)	Concentric normalized peak force (N·kg-1)	Concentric RFD (N·s-1)	Concentric normalized RFD (N·s-1·kg-1)			Eccentric peak force (N)	Eccentric normalized peak force (N·kg-1)	Eccentric RFD (N·s-1)	Eccentric normalized RFD (N·s-1·kg-1)		Isometric peak force (N)	Isometric normalized peak force (N·kg-1)	Isometric RFD (N·s-1)	Isometric normalized RFD (N·s-1·kg-1)		CODdeficit (s)	5yard sprint (s)	10yard sprint (s)	Pro-agility test (s)
1	20	173	76.8571		1848.47	24.0507	3949.38	51.386			1784.42	23.2173	4602.16	59.8795		1639.43	21.3309	3051.21	39.6997		1.08	1.1	1.79	5.07
2	20	171	80.3175		1739.9	21.6627	3065.37	38.1656			1837.99	22.8841	2241.19	27.9041		2682.18	33.3947	3728.89	46.4268		1.73	1.05	1.75	5.58
3	19	155	53.5139		1158.31	21.645	2152.57	40.2246			1140.96	21.3208	2318.5	43.3252		1489.49	27.8338	2962.94	55.3676		0.68	1.15	1.9	4.88
4	21	168	63.858		1508.17	23.6175	2117.02	33.152			1327.24	20.7842	2313.69	36.2318		1610.16	25.2147	1726.14	27.0309		1.76	1.09	1.82	5.76
5	21	163	61.9707		1470.05	23.7217	3690.85	59.5579			1669.56	26.9411	4823.29	77.8317		1675.93	27.0439	2419.01	39.0346		0.79	1.14	1.86	4.93
6	22	161	66.9383		1624.8	24.2731	3322.3	49.6323			1604.21	23.9654	5446.58	81.3671		1791.37	26.7616	2374.62	35.4747		0.54	1.17	1.9	4.78
7	20	173.5	63.6714		1457.38	22.889	2674.88	42.0107			1652.66	25.9561	5058.52	79.4472		1581.03	24.831	2606.87	40.9426		0.51	1.13	1.77	4.54
8	20	175	69.9468		1614.88	23.0872	3469.44	49.6012			1839.44	26.2977	5711.24	81.6512		1677.42	23.9814	3012.05	43.062		1.48	0.94	1.6	4.96
9	20	176	67.2111		1467.86	21.8396	3273.27	48.7013			1723.57	25.6442	5533.95	82.3369		1748.14	26.0097	3358.28	49.9661		1.68	1.14	1.85	5.81
10	24	156	55.8237		1104.82	19.7912	1613.79	28.9087			1406.03	25.187	5051.02	90.4818		1045.67	18.7316	2063.53	36.9651		0.58	1.31	2.2	5.4
11	21	183	82.5891		2047.14	24.7871	7832.38	94.8355			2232.21	27.0279	9324.72	112.905		2573.78	31.1636	3507.65	42.4711		0.46	1.06	1.73	4.31
12	22	153	46.9411		1016.8	21.6611	1921.9	40.9427			1007.69	21.4671	3020.84	64.3537		838.162	17.8556	1022.82	21.7893		0.78	1.3	2.1	5.48
13	20	176	65.1901		1768.64	27.1306	3967.14	60.8549			1912.08	29.3308	4166.25	63.9092		1286.79	19.739	759.523	11.6509		1.77	0.96	1.67	5.36
14	21	180	82.1929		1838.09	22.3632	3346.61	40.7166			1798.1	21.8766	5322.48	64.756		1437.4	17.4881	1975.18	24.031		1.09	1.23	2.04	5.59
15	21	165	71.4104		1360.21	19.0477	2081.65	29.1505			1620.97	22.6993	5269.49	73.7916		1656.46	23.1963	3170.25	44.3948		1.04	1.22	2.08	5.56
16	19	153	58.5305		1722.68	29.4322	5541.89	94.6838			1356.96	23.1837	4962.25	84.7804		1539.75	26.3067	2729.66	46.6365		1.04	1.13	1.87	5.17
17	20	163	64.3885		1328.16	20.6274	2313.23	35.9261			1400.71	21.754	4413.91	68.5512		1420.85	22.0668	2401.88	37.3029		1.19	1.09	1.84	5.21
18	18	155.8	69.1005		1682.11	24.343	3942.16	57.0498			1580.05	22.866	5568.74	80.5891		1169.33	16.9222	1160.56	15.9974		0.91	1.14	1.9	5.09
19	18	153.8	49.8206		1118.81	22.4568	1940.88	38.9573			1298.42	26.0619	4884.36	98.0389		864.791	17.3581	1246.16	21.4665		1.23	1.1	1.85	5.28
20	25	168	57.4923		1574.84	27.3922	4281.94	74.4785			1370.11	23.8312	1966.32	34.2015		1235.19	21.4844	1148.75	18.1441		1.05	1	1.68	4.73
21	25	172	68.5241		1647.41	24.0413	4268.33	62.2895			1870.24	27.2932	6714.69	97.9902		2096.2	30.5907	4766.39	62.1547		0.59	1.13	1.82	4.67
22	18	169.5	60.196		1524.58	25.3269	3800.8	63.1404			1584.68	26.3252	7013.15	116.505		1108.42	18.4135	999.912	11.7544		0.61	1.13	1.85	4.72
23	20	168	68.6061		1544.33	22.51	2898.08	42.2422			1522.9	22.1977	3425.81	49.9345		1598.74	23.3032	1866.54	23.0879		0.77	1.17	1.91	5.02
24	20	160	55.1686		1120.93	20.3183	2029.58	36.7887			1240.17	22.4796	4324.08	78.3792		1150.79	20.8594	2159.83	39.5474		0.62	1.28	2.07	5.25
25	18	160	67.6112		1346.55	19.916	2488.1	36.8001			1507.13	22.2911	4767.64	70.5156		1103.41	16.3199	1028.89	15.8316		0.95	1.11	1.88	5.05
26	22	162	59.7097		1338.88	22.4231	2701.83	45.2494			1334.96	22.3575	4362	73.0535		969.319	16.2338	959.923	19.7904		1	1.1	1.82	5.02
27	19	179	79.1894		1934.41	24.4276	2806.29	35.4377			1829.58	23.1038	5937.18	74.9744		1568.77	19.8104	2864.85	33.3764		0.88	1.05	1.72	4.7
28	24	166	53.6309		1148.01	21.4057	1873.01	34.9241			1030.41	19.2131	2513.11	46.8594		769.447	14.3471	574.268	8.69254		1.19	1.18	2.02	5.57
